# Supplementary material
Source: Springer Nature journal article supplement (https://www.springermedizin.de/resource/supplementary/12943_2014_1359_MOESM6_ESM.pdf/9552776)

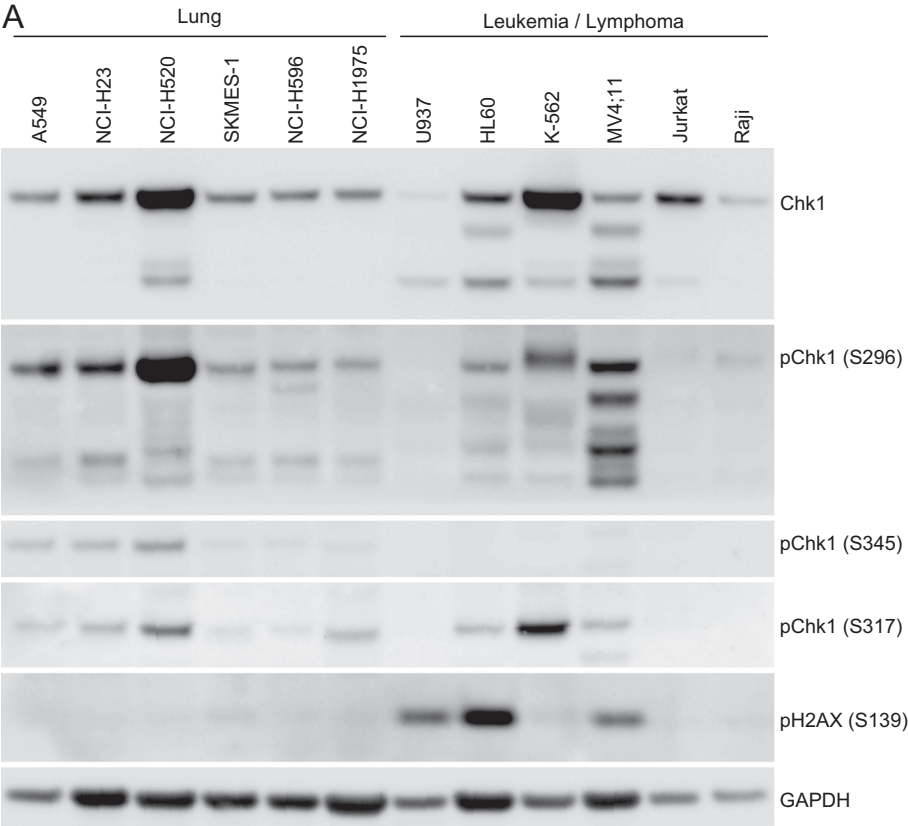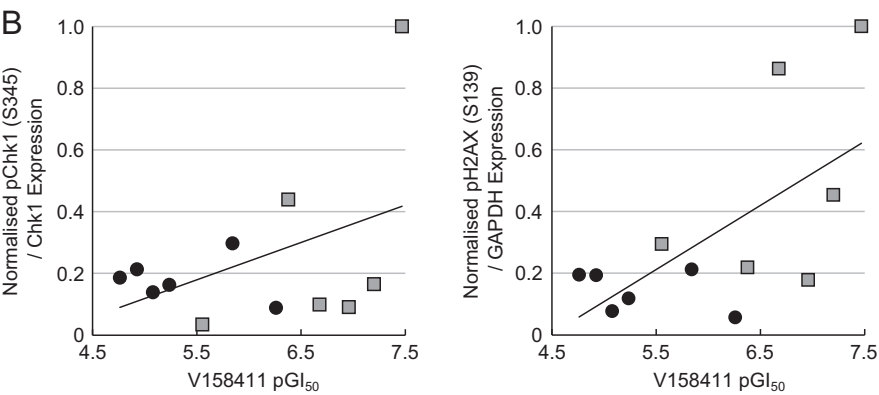

Supplement: MOESM6 [file 9552776]
